# Supplementary material for: Naïve B cells with low differentiation improve the immune reconstitution of HIV-infected patients
Source: PubMed Central journal article supplement — iScience. 2022 Nov 13;25(12):105559. doi: 10.1016/j.isci.2022.105559 (PMC9708917; doi:10.1016/j.isci.2022.105559), 2022-11-13
Supplement: mmc1.pdf [file mmc1.pdf]

iScience, Volume 25

## **Supplemental information**

**Naïve B cells with low differentiation  
improve the immune reconstitution  
of HIV-infected patients**

**Jie Jia, Yu Zhao, Ji-Qun Yang, Dan-Feng Lu, Xiu-Ling Zhang, Jun-Hong Mao, Kun-Hua Wang, Jian-Hua Wang, and Yi-Qun Kuang**

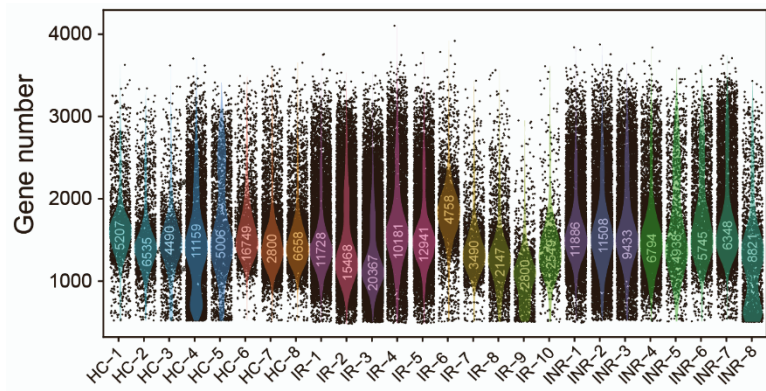

Figure S1. Single-cell sequencing of PBMC from the HC, IR and INR groups, related to Figure 1.



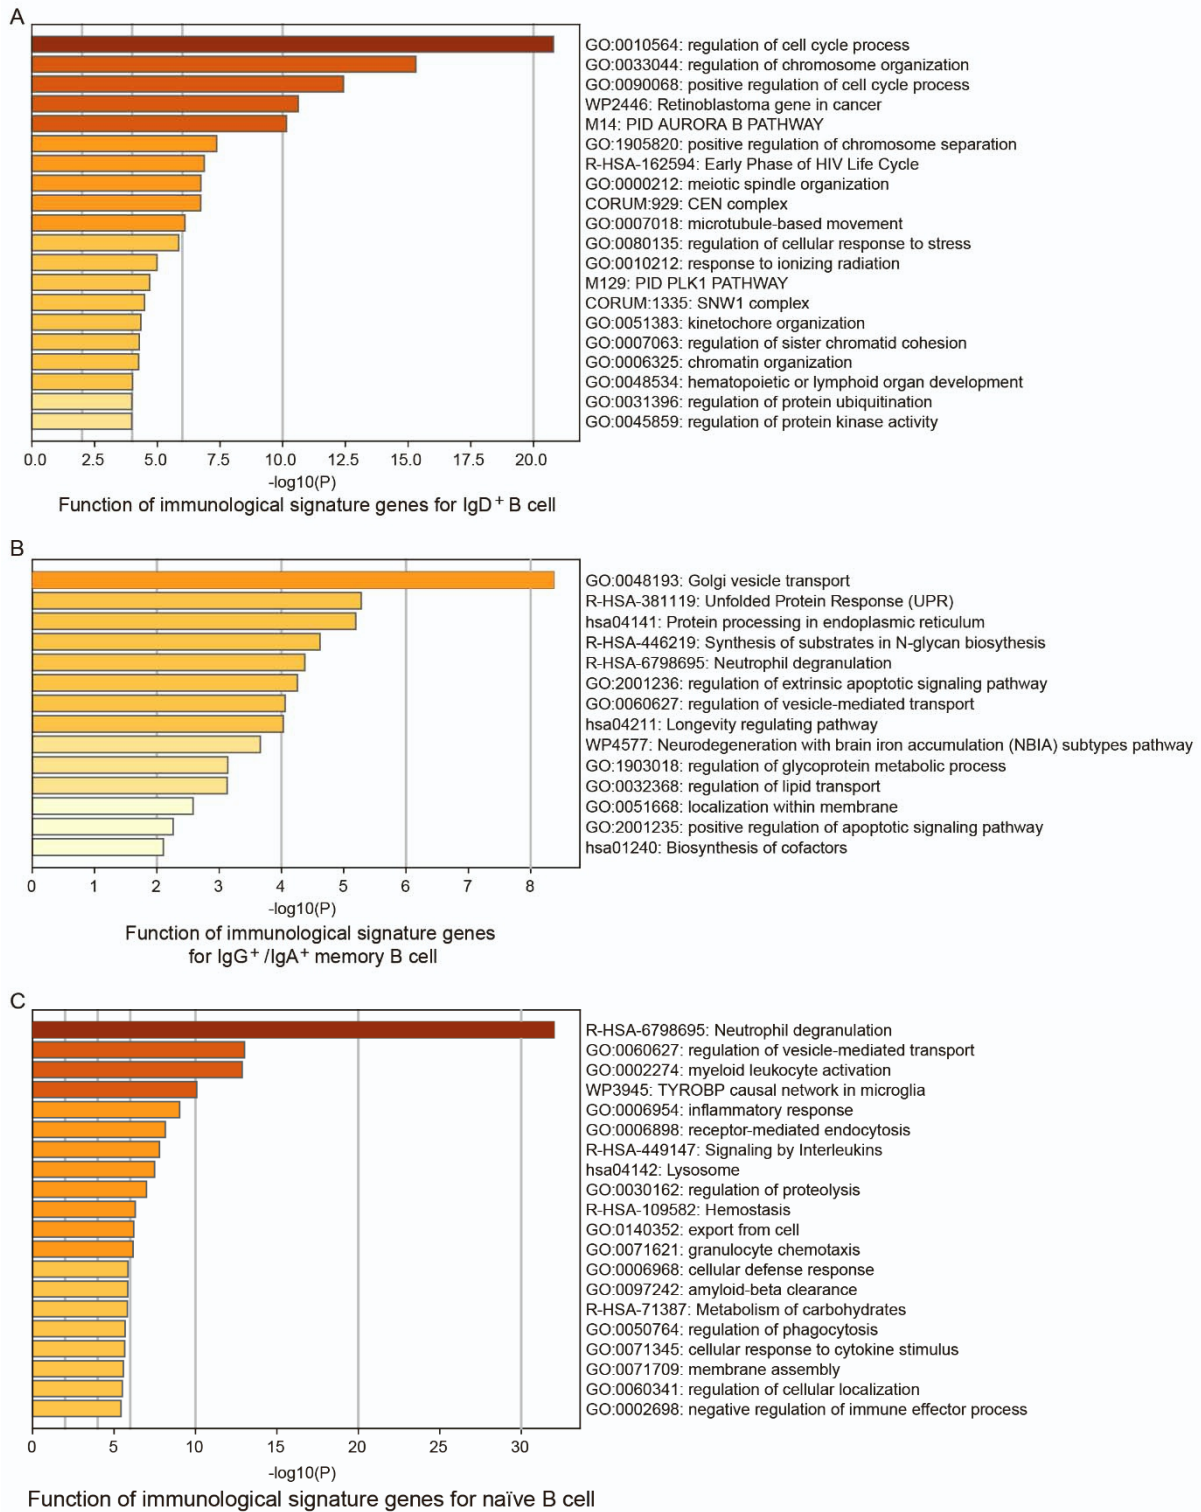

Figure S3. Function analysis of immunological signature genes for B cell subtypes, related to Figure 5.

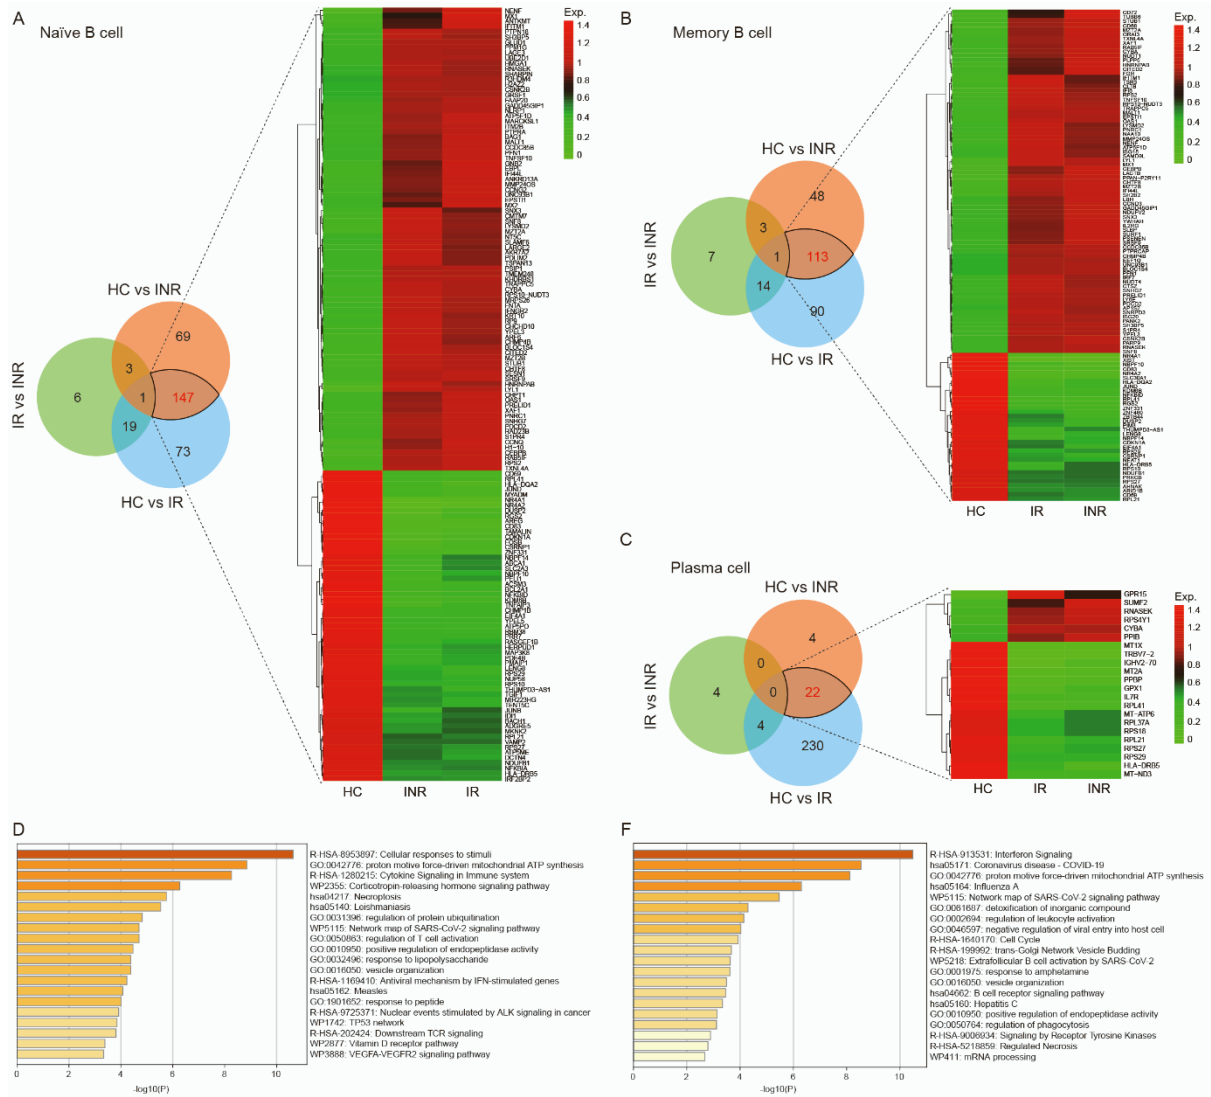

Figure S4. The DEGs related to HIV infection of three B cell subtypes among the HC, IR, and INR groups, related to Figure 5.

**Table S2.** Frequency of IGHV gene in naïve B cells (%), related to Figure 3

| Gene name   | HC   |      | IR   |      | INR  |      |
|-------------|------|------|------|------|------|------|
|             | Mean | SEM  | Mean | SEM  | Mean | SEM  |
| IGHV1-18    | 4.31 | 1.08 | 4.36 | 0.77 | 2.95 | 0.47 |
| IGHV1-2     | 2.28 | 0.68 | 4.30 | 0.77 | 4.40 | 0.93 |
| IGHV1-24    | 0.66 | 0.09 | 1.08 | 0.30 | 1.38 | 0.54 |
| IGHV1-3     | 2.26 | 0.93 | 1.80 | 0.26 | 1.56 | 0.51 |
| IGHV1-46    | 1.03 | 0.36 | 1.75 | 0.26 | 1.20 | 0.39 |
| IGHV1-58    | 0.66 | 0.09 | 0.05 | 0.05 | 0.14 | 0.14 |
| IGHV1-69    | 0.00 | 0.00 | 0.98 | 0.13 | 1.10 | 0.60 |
| IGHV1-69-2  | 0.00 | 0.00 | 0.00 | 0.00 | 0.12 | 0.12 |
| IGHV1-69D   | 3.64 | 1.15 | 1.74 | 0.70 | 3.29 | 0.84 |
| IGHV1-8     | 2.09 | 0.36 | 0.00 | 0.00 | 0.00 | 0.00 |
| IGHV1OR15-1 | 0.00 | 0.00 | 0.37 | 0.19 | 0.00 | 0.00 |
| IGHV2-26    | 0.76 | 0.21 | 0.78 | 0.33 | 0.59 | 0.32 |
| IGHV2-5     | 1.75 | 0.22 | 2.56 | 0.55 | 2.35 | 0.56 |
| IGHV2-70    | 0.49 | 0.22 | 0.69 | 0.38 | 1.52 | 0.62 |
| IGHV3-11    | 2.56 | 0.77 | 2.68 | 0.21 | 4.20 | 2.03 |
| IGHV3-13    | 0.41 | 0.28 | 0.41 | 0.13 | 1.22 | 0.30 |
| IGHV3-15    | 2.63 | 0.47 | 4.05 | 0.45 | 3.22 | 0.50 |
| IGHV3-20    | 0.70 | 0.36 | 0.27 | 0.17 | 0.40 | 0.12 |
| IGHV3-21    | 4.61 | 0.59 | 3.98 | 0.19 | 3.70 | 1.01 |
| IGHV3-23    | 8.63 | 1.12 | 8.64 | 1.03 | 9.28 | 1.08 |
| IGHV3-30    | 6.15 | 1.07 | 7.81 | 1.89 | 7.69 | 0.91 |
| IGHV3-33    | 7.77 | 0.92 | 2.89 | 0.63 | 5.19 | 1.97 |
| IGHV3-43    | 4.16 | 1.33 | 4.09 | 0.80 | 5.27 | 1.35 |
| IGHV3-48    | 2.60 | 0.46 | 4.10 | 0.50 | 2.88 | 0.21 |
| IGHV3-49    | 1.57 | 0.42 | 0.96 | 0.42 | 1.85 | 0.58 |
| IGHV3-53    | 1.57 | 0.57 | 0.67 | 0.31 | 2.29 | 0.49 |
| IGHV3-64    | 0.12 | 0.12 | 0.78 | 0.40 | 0.12 | 0.12 |
| IGHV3-64D   | 0.24 | 0.24 | 0.10 | 0.10 | 0.00 | 0.00 |
| IGHV3-66    | 0.72 | 0.38 | 1.33 | 0.44 | 0.89 | 0.27 |
| IGHV3-7     | 2.66 | 0.52 | 3.59 | 0.76 | 2.77 | 0.53 |
| IGHV3-72    | 0.15 | 0.09 | 0.16 | 0.13 | 0.14 | 0.14 |
| IGHV3-73    | 0.42 | 0.17 | 1.09 | 0.46 | 0.23 | 0.23 |
| IGHV3-74    | 1.43 | 0.31 | 1.66 | 0.37 | 1.70 | 0.10 |
| IGHV4-28    | 0.00 | 0.00 | 0.14 | 0.14 | 0.00 | 0.00 |
| IGHV4-30-2  | 3.91 | 0.43 | 0.00 | 0.00 | 0.00 | 0.00 |
| IGHV4-31    | 1.20 | 0.35 | 1.12 | 0.70 | 1.61 | 0.25 |
| IGHV4-34    | 7.39 | 2.14 | 7.36 | 1.22 | 6.62 | 0.73 |
| IGHV4-39    | 5.85 | 0.32 | 5.72 | 0.45 | 4.43 | 0.51 |
| IGHV4-4     | 1.93 | 0.82 | 2.15 | 0.51 | 0.64 | 0.32 |
| IGHV4-59    | 5.37 | 0.90 | 5.71 | 1.37 | 5.93 | 0.96 |
| IGHV4-61    | 0.41 | 0.20 | 1.87 | 1.25 | 3.06 | 1.25 |
| IGHV5-10-1  | 0.00 | 0.00 | 0.32 | 0.20 | 0.00 | 0.00 |
| IGHV5-51    | 2.98 | 1.09 | 3.04 | 0.12 | 2.88 | 0.92 |
| IGHV6-1     | 1.14 | 0.36 | 1.33 | 0.41 | 1.03 | 0.35 |
| IGHV7-4-1   | 1.37 | 0.47 | 2.04 | 0.60 | 1.61 | 0.25 |

**Table S3.** Frequency of IGHJ gene in naïve B cells (%), related to Figure 3

| Gene name | HC    |      | IR    |      | INR   |      |
|-----------|-------|------|-------|------|-------|------|
|           | Mean  | SEM  | Mean  | SEM  | Mean  | SEM  |
| IGHJ1     | 0.73  | 0.31 | 1.54  | 0.47 | 1.25  | 0.30 |
| IGHJ2     | 2.25  | 0.80 | 2.51  | 0.41 | 2.26  | 0.38 |
| IGHJ3     | 9.85  | 1.01 | 12.24 | 1.36 | 15.07 | 1.68 |
| IGHJ4     | 42.38 | 1.42 | 49.91 | 1.69 | 53.25 | 1.76 |
| IGHJ5     | 11.48 | 1.29 | 11.40 | 1.62 | 9.53  | 0.84 |
| IGHJ6     | 33.88 | 0.91 | 22.92 | 2.02 | 20.07 | 1.69 |

**Table S4.** Frequency of IGHV gene in memory B cells (%), related to Figure 3

| Gene name    | HC    |      | IR    |      | INR  |      |
|--------------|-------|------|-------|------|------|------|
|              | Mean  | SEM  | Mean  | SEM  | Mean | SEM  |
| IGHV1/OR15-1 | 0.21  | 0.21 | 0.00  | 0.00 | 0.00 | 0.00 |
| IGHV1-18     | 5.02  | 1.43 | 3.82  | 0.94 | 4.10 | 0.48 |
| IGHV1-2      | 0.54  | 0.41 | 3.41  | 1.09 | 1.94 | 1.10 |
| IGHV1-24     | 0.70  | 0.36 | 0.29  | 0.19 | 0.66 | 0.39 |
| IGHV1-3      | 2.45  | 0.91 | 1.62  | 0.26 | 3.99 | 1.33 |
| IGHV1-45     | 0.11  | 0.11 | 0.22  | 0.22 | 0.00 | 0.00 |
| IGHV1-46     | 2.77  | 0.72 | 2.29  | 0.89 | 2.91 | 0.35 |
| IGHV1-58     | 0.00  | 0.00 | 0.33  | 0.14 | 0.00 | 0.00 |
| IGHV1-69     | 0.26  | 0.16 | 0.67  | 0.28 | 1.03 | 0.21 |
| IGHV1-69-2   | 0.00  | 0.00 | 0.00  | 0.00 | 0.22 | 0.22 |
| IGHV1-69D    | 2.49  | 0.80 | 0.86  | 0.53 | 2.96 | 1.43 |
| IGHV1-8      | 1.84  | 0.55 | 0.00  | 0.00 | 0.00 | 0.00 |
| IGHV1OR15-1  | 0.00  | 0.00 | 0.41  | 0.25 | 0.59 | 0.32 |
| IGHV2-26     | 0.32  | 0.20 | 0.15  | 0.10 | 0.87 | 0.44 |
| IGHV2-5      | 2.98  | 0.75 | 2.16  | 0.57 | 3.37 | 1.11 |
| IGHV2-70     | 0.15  | 0.15 | 0.34  | 0.24 | 0.79 | 0.40 |
| IGHV2-70D    | 0.00  | 0.00 | 0.23  | 0.18 | 0.00 | 0.00 |
| IGHV3-11     | 1.35  | 0.42 | 2.60  | 0.30 | 2.40 | 1.22 |
| IGHV3-13     | 0.32  | 0.20 | 0.05  | 0.05 | 1.16 | 0.64 |
| IGHV3-15     | 2.73  | 0.65 | 3.29  | 0.61 | 3.28 | 0.06 |
| IGHV3-20     | 1.23  | 0.58 | 0.61  | 0.38 | 1.17 | 0.52 |
| IGHV3-21     | 3.17  | 1.64 | 2.53  | 0.30 | 3.19 | 1.05 |
| IGHV3-23     | 11.07 | 0.97 | 10.04 | 0.91 | 8.42 | 0.74 |
| IGHV3-30     | 6.82  | 1.05 | 8.47  | 1.76 | 7.60 | 0.33 |
| IGHV3-33     | 6.59  | 0.85 | 2.22  | 0.49 | 3.60 | 1.51 |
| IGHV3-35     | 0.00  | 0.00 | 0.36  | 0.36 | 0.00 | 0.00 |
| IGHV3-43     | 3.02  | 1.30 | 4.68  | 0.43 | 2.29 | 0.98 |
| IGHV3-48     | 5.78  | 0.62 | 4.05  | 1.50 | 4.45 | 0.64 |
| IGHV3-49     | 1.01  | 0.37 | 1.25  | 0.47 | 0.43 | 0.22 |
| IGHV3-53     | 1.44  | 0.28 | 0.70  | 0.21 | 2.24 | 0.53 |
| IGHV3-64     | 0.11  | 0.11 | 0.19  | 0.19 | 0.00 | 0.00 |
| IGHV3-64D    | 0.17  | 0.17 | 0.05  | 0.05 | 0.00 | 0.00 |
| IGHV3-66     | 0.83  | 0.42 | 1.48  | 0.61 | 0.95 | 0.66 |
| IGHV3-7      | 5.57  | 0.60 | 5.41  | 0.68 | 5.69 | 1.36 |
| IGHV3-72     | 1.28  | 1.04 | 0.23  | 0.18 | 0.66 | 0.39 |
| IGHV3-73     | 0.60  | 0.31 | 0.90  | 0.36 | 0.66 | 0.39 |
| IGHV3-74     | 2.24  | 0.66 | 4.83  | 0.38 | 2.24 | 0.53 |
| IGHV3OR16-10 | 0.00  | 0.00 | 0.09  | 0.09 | 0.00 | 0.00 |
| IGHV3OR16-12 | 0.00  | 0.00 | 0.10  | 0.10 | 0.21 | 0.21 |
| IGHV4-28     | 0.00  | 0.00 | 0.36  | 0.20 | 0.22 | 0.22 |
| IGHV4-30-2   | 2.70  | 0.86 | 0.00  | 0.00 | 0.00 | 0.00 |
| IGHV4-31     | 0.11  | 0.11 | 0.54  | 0.33 | 1.86 | 0.99 |
| IGHV4-34     | 1.91  | 0.50 | 4.00  | 1.30 | 4.14 | 0.50 |
| IGHV4-39     | 4.35  | 0.79 | 6.29  | 0.99 | 3.90 | 0.92 |
| IGHV4-4      | 0.57  | 0.44 | 0.94  | 0.29 | 1.25 | 0.40 |
| IGHV4-59     | 5.42  | 1.48 | 6.60  | 0.53 | 7.03 | 1.51 |
| IGHV4-61     | 1.78  | 0.10 | 2.55  | 1.30 | 1.84 | 0.62 |
| IGHV5-10-1   | 0.17  | 0.17 | 0.65  | 0.40 | 0.00 | 0.00 |
| IGHV5-51     | 3.13  | 0.61 | 3.94  | 0.88 | 2.75 | 1.39 |
| IGHV6-1      | 1.67  | 0.43 | 1.41  | 0.57 | 1.02 | 0.18 |
| IGHV7-4-1    | 3.31  | 0.99 | 2.88  | 1.00 | 2.76 | 0.83 |



**Table S5.** Frequency of IGHJ gene in memory B cells (%), related to Figure 3

| Gene name | HC    |      | IR    |      | INR   |      |
|-----------|-------|------|-------|------|-------|------|
|           | Mean  | SEM  | Mean  | SEM  | Mean  | SEM  |
| IGHJ1     | 2.01  | 0.57 | 2.40  | 0.72 | 1.61  | 0.31 |
| IGHJ2     | 2.73  | 0.34 | 3.90  | 1.31 | 4.76  | 0.67 |
| IGHJ3     | 11.24 | 1.03 | 11.17 | 1.60 | 9.98  | 2.13 |
| IGHJ4     | 54.48 | 2.03 | 51.37 | 1.91 | 54.42 | 1.61 |
| IGHJ5     | 11.75 | 1.54 | 14.43 | 0.98 | 13.97 | 0.94 |
| IGHJ6     | 18.10 | 1.52 | 17.83 | 2.35 | 16.12 | 0.88 |
